# Supplementary material for: JAG1 Is Associated with Poor Survival through Inducing Metastasis in Lung Cancer
Source: PLOS journal article supplement (doi:10.1371/journal.pone.0150355), 2016-03-01

**S1 Fig. JAG1 expression and NSCLC patients' survival.**

JAG1 mRNA level and overall survival of NSCLC patients (n=90). All statistical tests were two sided, and  $p < 0.05$  was considered to be statistically significant.

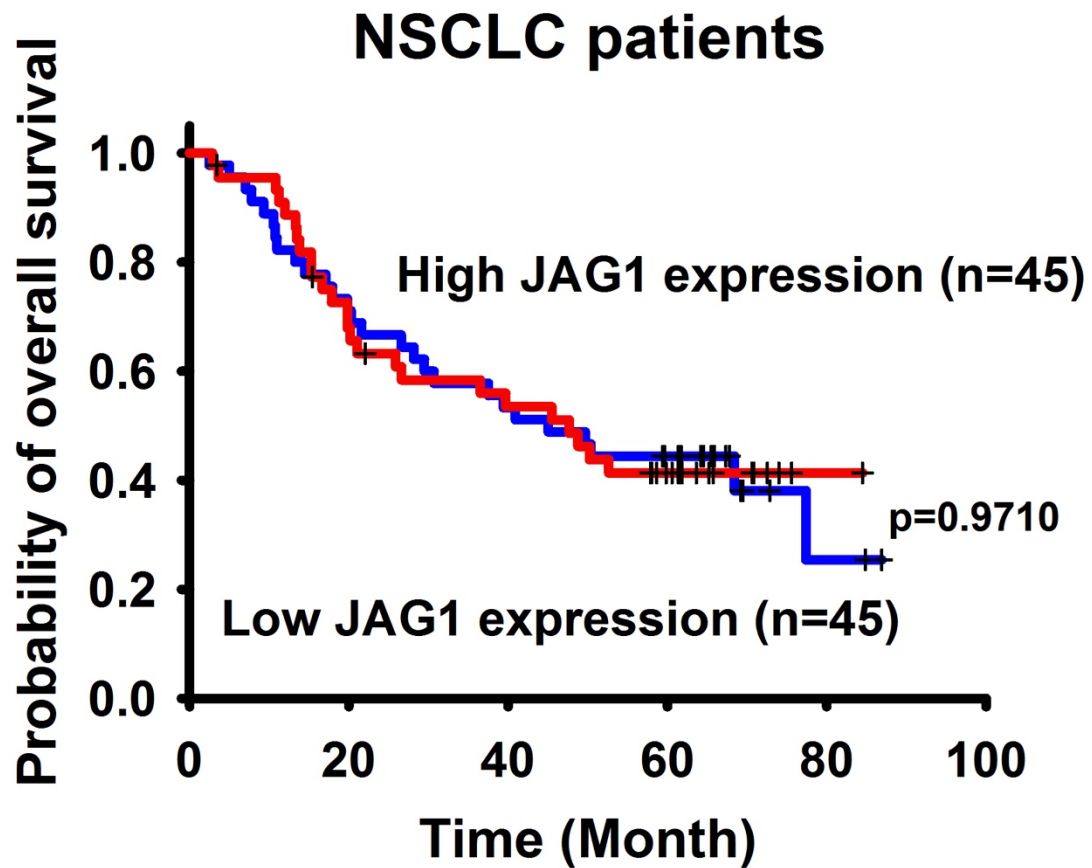

Supplement: S1 (10.1371/journal.pone.0150355.s001) [file journal.pone.0150355.s001]
