# Supplementary material for: JAG1 Is Associated with Poor Survival through Inducing Metastasis in Lung Cancer
Source: PLOS journal article supplement (doi:10.1371/journal.pone.0150355), 2016-03-01

**S4 Fig. HSPA2 mRNA expression is down-regulated by JAG1 mRNA silencing.**

Left, JAG1 mRNA level was silenced by two independent specific siRNA in HOP62 and H322M cell lines. Right, HSPA2 mRNA was measured by real-time quantitative RT-PCR and normalized to TBP.

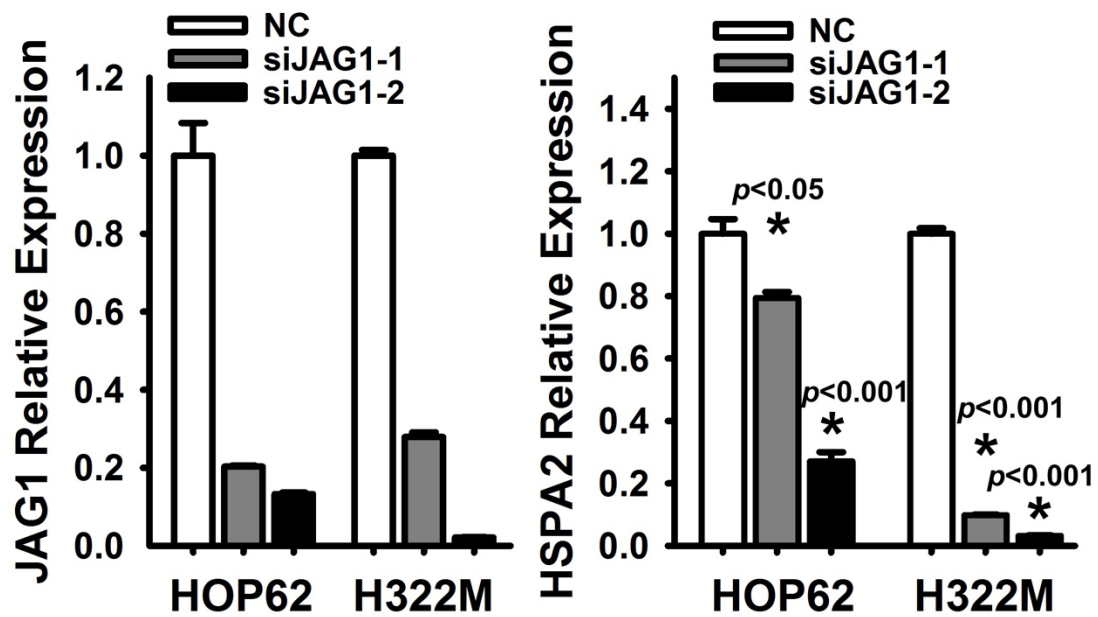

Supplement: S4 (10.1371/journal.pone.0150355.s004) [file journal.pone.0150355.s004]
